# Supplementary material for: Remote multidisciplinary heart team meetings in immersive virtual reality: a first experience during the COVID-19 pandemic
Source: PubMed Central journal article supplement (PMC7938471; doi:10.1136/bmjinnov-2021-000662), 2021-03-05
Supplement: bmjinnov-2021-000662supp003.pdf [file bmjinnov-2021-000662supp003.pdf]

**Alternative meeting methods**

Regarding ease-of-use, virtual reality conferencing is a..... way for organizing remote heart team meetings when compared to tele/video conferencing.

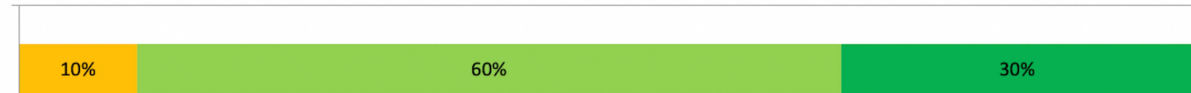

Regarding usefulness and effectiveness, virtual reality conferencing is a..... way for organizing remote multidisciplinary heart team meetings when compared to tele/video conferencing.

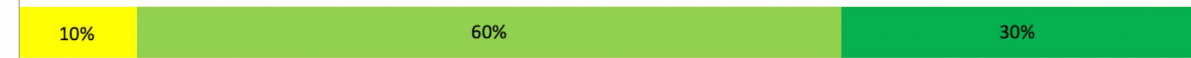

Regarding usefulness and effectiveness, virtual reality conferencing is a..... way for organizing remote multidisciplinary heart team meetings when compared to physical meetings.

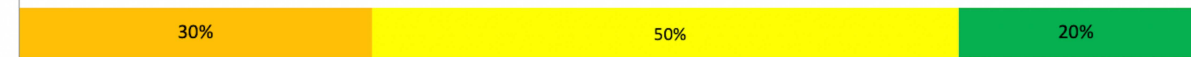

Regarding immersiveness (engagement in virtual environment), virtual reality conferencing is a..... way for organizing remote multidisciplinary heart team meetings when compared to tele/video conferencing.

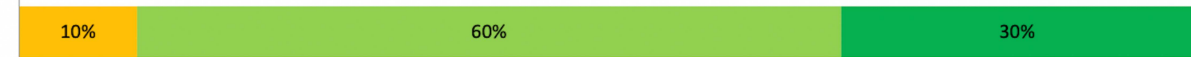

■ Much worse ■ Somewhat worse ■ Similar ■ Somewhat better ■ Much better
