# Supplementary material for: Remote multidisciplinary heart team meetings in immersive virtual reality: a first experience during the COVID-19 pandemic
Source: PubMed Central journal article supplement (PMC7938471; doi:10.1136/bmjinnov-2021-000662), 2021-03-05

**Attitude towards (future) use**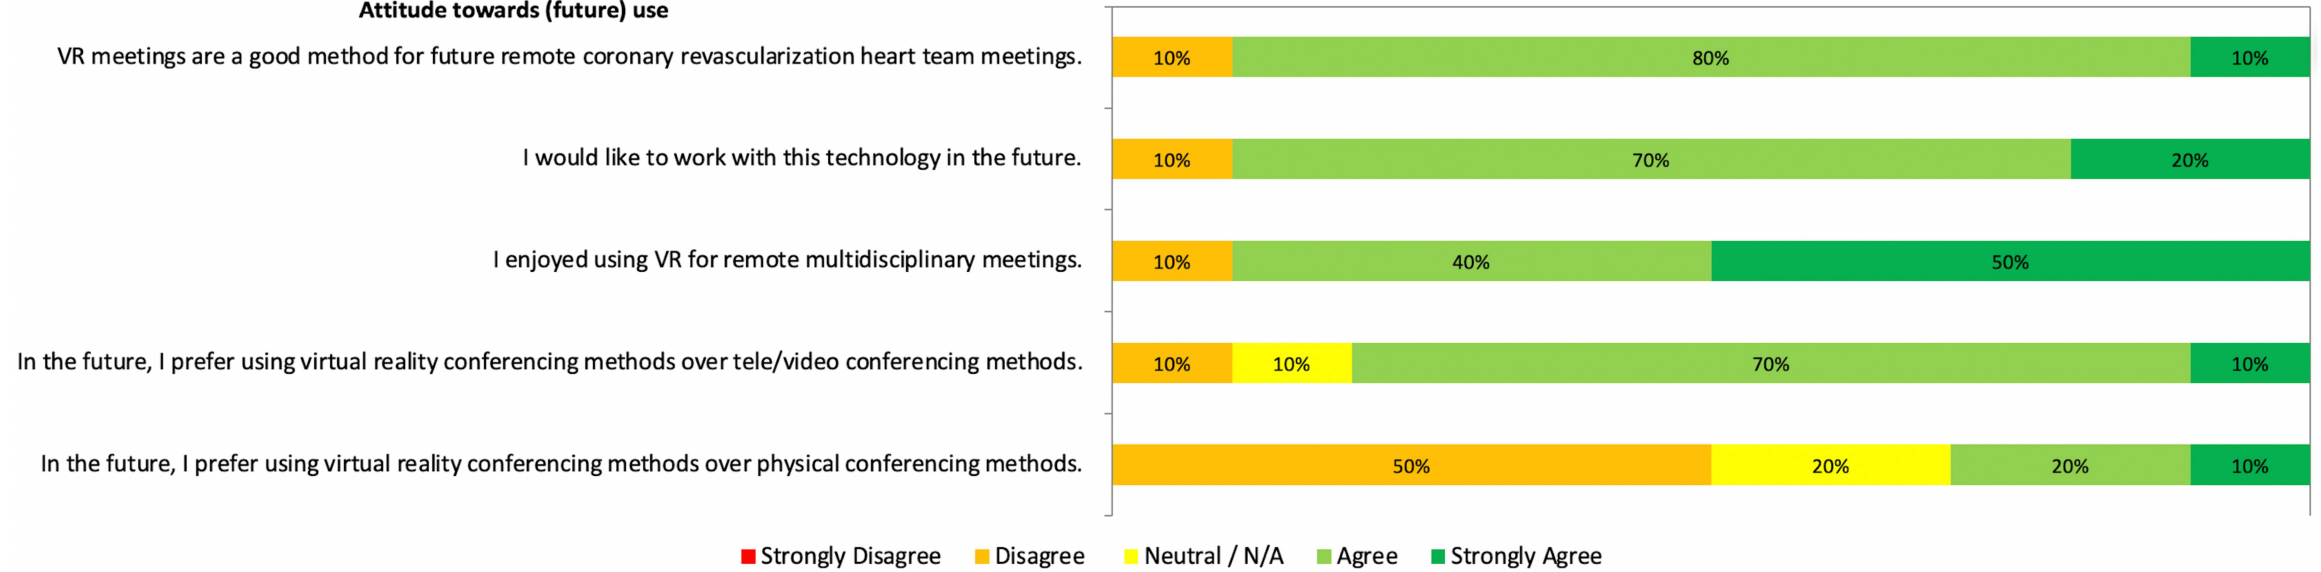

Supplement: bmjinnov-2021-000662supp004.pdf [file bmjinnov-2021-000662supp004.pdf]
